# Supplementary material for: Recovering Climatic Data from Documentary Sources: A Case Study of the Climate in Southern Spain from 1792 to 1808
Source: Preprints.org preprint supplement (doi:10.20944/preprints202002.0058.v1), 2020-02-05
Supplement: Supplementary file 2 [file supplementary]

**RECOVERING CLIMATIC DATA FROM DOCUMENTARY SOURCES: A CASE STUDY OF THE CLIMATE IN SOUTHERN SPAIN FROM 1792 TO 1808**

F.S. RODRIGO

Dep. Chemistry and Physics, University of Almería, Spain

frodrigo@ual.es

**SUPPLEMENTARY MATERIAL**

In this document are included the following Figures and Tables:

Figure S1. (a) Number of seasonal records in Seville, 1792-1808, and combined temperature-rainfall conditions for winter (b), spring (c), summer (d), and autumn (e). Years are indicated by the last two digits.

Figure S2. As Fig. S1, for Córdoba.

Figure S3. As Figure S1 for Jaén.

Figure S4. As Figure S1 for Granada.

Figure S5. As Figure S1 for Murcia.

Table S1. Reports dated from 18 to 20 January 1799 (issues 6-11, 1799, Figure 6a).

Table S2. Reports dated from 12 to 14 April 1793 (issues 8-11, vol. 2, 1793, Figure 7a).

Table S3. Reports dated from 15 to 17 July 1796 (issues 57-60, 1796, Figure 8a).

Table S4. Reports dated from 21 to 23 November 1794 (issues 94-99, 1794, Figure 9a).

Figure S1. (a) Number of seasonal records in Seville, 1792-1808, and combined temperature-rainfall conditions for winter (b), spring (c), summer (d), and autumn (e). Years are indicated by the last two digits.

**94**

**00**

**94**

**95**

**99**

**95**

**96**

**07**

**97**

**93**

**98**

**96**

**04**

**07**

**98**

**99**

**97**

**93**

**08**

**02**

**95**

**07**

**94**

**93**

**93**

**94**

**95**

**99**

**96**

**06**

**97**

**07**

**97**

**99**

**96**

Figure S2. As Fig. S1, for Córdoba.

**99**

**97**

**07**

**01**

**96**

**94**

**98**

**00**

**93**

**95**

**03**

**96**

**94**

**08**

**04**

**97**

**98**

**07**

**93**

**08**

**99**

**01**

**94**

**92**

**95**

**06**

**99**

**93**

**01**

**97**

**03**

**07**

**99**

**96**

**94**

**03**

**93**

**08**

**00**

**02**

**97**

**95**

Figure S3. As Figure S1 for Jaén.

**07**

**00**

**96**

**97**

**95**

**94**

**01**

**08**

**99**

**96**

**04**

**93**

**02**

**98**

**01**

**08**

**99**

**94**

**93**

**93**

**95**

**92**

**01**

**93**

**99**

**02**

**99**

**96**

**97**

**94**

**00**

**01**

**07**

**97**

**96**

**00**

**03**

**94**

**95**

Figure S4. As Figure S1 for Granada.

**94**

**02**

**99**

**95**

**04**

**00**

**95**

**96**

**03**

**00**

**98**

**93**

**98**

**93**

**01**

**94**

**03**

**08**

**07**

**07**

**04**

**08**

**02**

**96**

**02**

**07**

**03**

**96**

**97**

**95**

**02**

**97**

**93**

**00**

**01**

**92**

**94**

**96**

**95**

**06**

**01**

**03**

**07**

**94**

**00**

Figure S5. As Figure S1 for Murcia.

**95**

**96**

**95**

**94**

**94**

**97**

**93**

**08**

**08**

**07**

**07**

**04**

**97**

**01**

**03**

**04**

**00**

**96**

**93**

**98**

**02**

**93**

**99**

**95**

**03**

**06**

**97**

**94**

**93**

**07**

**92**

**96**

**95**

**01**

**96**

**00**

**00**

**03**

**01**

**97**

**07**

**94**

**02**

Table S1. Reports dated from 18 to 20 January 1799 (issues 6-11, 1799, Figure 6a).

| **Province** | **Date** | **Text (ancient Spanish)** | **Text (English)** |
| --- | --- | --- | --- |
| Cuenca | 18/01/1799 | yela mucho | It freezes a lot |
| Catalonia | 18/01/1799 | Muy frío y yela bastante | Very cold and it freezes enough |
| Toledo | 19/01/1799 | despejado | Cloudless |
| Avila | 19/01/1799 | Continúan los yelos | Ice continues |
| Segovia | 19/01/1799 | Hace frío con nieblas | It is cold with fog |
| Zamora | 19/01/1799 | Continúan los yelos | Ice continues |
| Toro | 19/01/1799 | Continúan los yelos | Ice continues |
| Soria | 19/01/1799 | Despejado con escarchas | Cloudless with frost |
| Oviedo | 19/01/1799 | Continúan los frios | Cold continues |
| Galicia | 19/01/1799 | Hace un tiempo propio de la estacion | Weather typical of the season |
| Valencia | 19/01/1799 | Yela mucho | It freezes a lot |
| Seville | 19/01/1799 | Sereno y frío | Quiet and cold |
| Granada | 19/01/1799 | Caen grandes escarchas poco comunes en este país | Great frosts, rare events in this country |
| Jaén | 20/01/1799 | Sereno y frío | Quiet and cold |

Table S2. Reports dated from 12 to 14 April 1793 (issues 8-11, vol. 2, 1793, Figure 7a).

| **Province** | **Date** | **Text (ancient Spanish)** | **Text (English)** |
| --- | --- | --- | --- |
| Madrid | 12/04/1793 | Ha llovido abundantemente | It has rained abundantly |
| Oviedo | 12/04/1793 | Siguen las lluvias y nieves favorables para los campos | Rain and snow favourable for fields continue |
| La Mancha | 12/04/1793 | Ha llovido abundantemente | It has rained abundantly |
| Cuenca | 12/04/1793 | Claro y templado | Clear and mild |
| Segovia | 13/04/1793 | Ha llovido y nevado bien, lo que ha sido muy provechoso | It has rained and snowed well, very beneficial for fields |
| Valladolid | 13/04/1793 | Ha llovido y nevado bien, lo que ha sido muy provechoso | It has rained and snowed well, very beneficial for fields |
| Extremadura | 13/04/1793 | Muy favorable | Very favourable |
| Murcia | 13/04/1793 | Siguen las rogativas para alcanzar el agua, que se necesita bastante | Rogations praying for water continue, it is quite necessary |
| Seville | 13/04/1793 | Ha llovido abundantemente | It has rained abundantly |
| Málaga | 13/04/1793 | Ha llovido abundantemente | It has rained abundantly |
| Avila | 13/04/1793 | Siguen las lluvias y nieves favorables para los campos | Rain and snow favourable for fields continue |
| Aragón | 13/04/1793 | Siguen las lluvias y nieves favorables para los campos | Rain and snow favourable for fields continue |
| Burgos | 13/04/1793 | Siguen las lluvias y nieves favorables para los campos | Rain and snow favourable for fields continue |
| Zamora | 13/04/1793 | Siguen las lluvias y nieves favorables para los campos | Rain and snow favourable for fields continue |
| Soria | 13/04/1793 | Siguen las lluvias y nieves favorables para los campos | Rain and snow favourable for fields continue |
| Toro | 13/04/1793 | Siguen las lluvias y nieves favorables para los campos | Rain and snow favourable for fields continue |
| Jaén | 13/04/1793 | Han continuado las nieves y lluvias | Snow and rain have continued |
| Granada | 13/04/1793 | Han continuado las nieves y lluvias | Snow and rain have continued |
| León | 14/04/1793 | Siguen las lluvias y nieves favorables para los campos | Rain and snow favourable for fields continue |

Table S3. Reports dated from 15 to 17 July 1796 (issues 57-60, 1796, Figure 8a).

| **Province** | **Date** | **Text (ancient Spanish)** | **Text (English)** |
| --- | --- | --- | --- |
| Burgos | 15/07/1796 | Sereno con vientos levantes | Quiet with east winds |
| La Mancha | 15/07/1796 | despejado | Cloudless |
| Granada | 15/07/1796 | Prosiguen los calores | Warm continues |
| Avila | 16/07/1796 | Caloroso y conveniente para las labores actuales del campo | Warm and convenient for field works |
| Segovia | 16/07/1796 | Caloroso y conveniente para las labores actuales del campo | Warm and convenient for field works |
| Salamanca | 16/07/1796 | Caloroso y conveniente para las labores actuales del campo | Warm and convenient for field works |
| Zamora | 16/07/1796 | Calores propios de la estacion | Warm typical of the season |
| Toro | 16/07/1796 | Calores propios de la estacion | Warm typical of the season |
| Valladolid | 16/07/1796 | Calores propios de la estacion | Warm typical of the season |
| Aragón | 16/07/1796 | Calores excesivos | Excessive warm |
| Valencia | 16/07/1796 | apacible | Mild |
| Toledo | 17/07/1796 | Sereno | Quiet |
| Córdoba | 17/07/1796 | Sereno y favorable para la recolección de frutos | Quiet and favourable for fruit harvesting |

Table S4. Reports dated from 21 to 23 November 1794 (issues 94-99, 1794, Figure 9a).

| **Province** | **Date** | **Text (ancient Spanish)** | **Text (English)** |
| --- | --- | --- | --- |
| Madrid | 21/11/1794 | Ha llovido copiosamente | It has rained copiously |
| La Mancha | 21/11/1794 | Ha llovido bastante para concluir la sementera | It has rained sufficient to finish the sowing |
| Segovia | 22/11/1794 | Ha serenado el tiempo despues de haber llovido | It has become quiet after rain |
| Murcia | 22/11/1794 | Seco y sereno | Dry and quiet |
| Zamora | 22/11/1794 | Está el tiempo metido en aguas | Rainy |
| Salamanca | 22/11/1794 | Está el tiempo metido en aguas | Rainy |
| Burgos | 22/11/1794 | Está el tiempo metido en aguas | Rainy |
| Aragón | 22/11/1794 | Continua la sequedad | Dryness continues |
| Seville | 22/11/1794 | Copiosa lluvia | Copious rain |
| Galicia | 22/11/1794 | Frío y lluvioso | Cold and rainy |
| Catalonia | 22/11/1794 | Vario y frio | Variable and cold |
| Córdoba | 23/11/1794 | Ha llovido y sigue lloviendo | It has rained, and the rain continues |
| Jaén | 23/11/1794 | Ha llovido abundantemente | It has rained abundantly |
| Granada | 23/11/1794 | Ha llovido abundantemente | It has rained abundantly |
